# Supplementary material for: M1/M2-macrophage phenotypes regulate renal calcium oxalate crystal development
Source: PubMed Central journal article supplement (PMC5059697; doi:10.1038/srep35167), 2016-10-12

## **SUPPLEMENTARY INFORMATION**

### **Title:**

**M1/M2-macrophage phenotypes regulate renal calcium oxalate crystal development**

### **Authors:**

Kazumi Taguchi, Atsushi Okada\*, Shuzo Hamamoto, Rei Unno, Yoshinobu Moritoki, Ryosuke Ando, Kentaro Mizuno, Keiichi Tozawa, Kenjiro Kohri, Takahiro Yasui

*Department of Nephro-urology, Nagoya City University Graduate School of Medical Sciences,  
Nagoya, Japan.*

**Supplementary Table 1.** Information on the age, gender, side of tissue collection, basic metabolic index (BMI), and serum and urinary variables of patients

|                |                   | Control<br>( n = 6 ) | CaOx stone former<br>( n = 6 ) | P value          |
|----------------|-------------------|----------------------|--------------------------------|------------------|
| <i>General</i> |                   |                      |                                |                  |
| Age            | y.o               | 49 ± 7               | 56 ± 4                         | N.S*             |
| Gender         | M, F              | 3, 3                 | 4, 2                           | N.S <sup>#</sup> |
| Side           | Rt, Lt            | 3, 3                 | 2, 4                           | N.S <sup>#</sup> |
| BMI            | kg/m <sup>2</sup> | 22.7 ± 1.1           | 22.3 ± 1.8                     | N.S*             |
| <i>Serum</i>   |                   |                      |                                |                  |
| BUN            | mg/dl             | 13.2 ± 1.6           | 14.2 ± 1.8                     | N.S*             |
| Cre            | mg/dl             | 0.9 ± 0.2            | 0.8 ± 0.1                      | N.S*             |
| Ca             | mg/dl             | 9.4 ± 0.3            | 9.5 ± 0.2                      | N.S*             |
| P              | mg/dl             | 2.9 ± 0.5            | 3.1 ± 0.2                      | N.S*             |
| UA             | mg/dl             | 5.1 ± 0.5            | 5.8 ± 0.3                      | N.S*             |
| WBC            | cells/μl          | 6650 ± 765           | 7200 ± 875                     | N.S*             |
| CRP            | mg/dl             | 2.1 ± 1.8            | 0.1 ± 0.1                      | N.S*             |
| <i>Urine</i>   |                   |                      |                                |                  |
| pH             |                   | 6.8 ± 0.6            | 6.6 ± 0.7                      | N.S*             |
| WBC            | cells/HPF         | 4 ± 2                | 26 ± 16                        | N.S*             |
| RBC            | cells/HPF         | 19 ± 16              | 37 ± 14                        | N.S*             |

Mean ± standard deviation (SD). \* Mann-Whitney *U* test, § Student's t-test, and <sup>#</sup> Fisher's exact test.

Abbreviations: CaOx, calcium oxalate; BUN, blood urea nitrogen; Cre, creatinine; Ca, calcium; P, phosphorus; UA, uric acid; WBC, white blood cell; CRP, c-reactive protein; RBC, red blood cell; y.o, years old; M, male; F, female; Rt, right; Lt, left; HPF, high power field, NS, not significant.

**Supplementary Table 2.** Primary/secondary antibodies for flow cytometry.

| <b>Protein Name</b> | <b>Antibodies</b>                                 | <b>Product Codes</b>               |
|---------------------|---------------------------------------------------|------------------------------------|
| <i>Primary</i>      |                                                   |                                    |
| Ly-6C               | V450 rat anti-mouse Ly-6C (AL-21)                 | 560894 (BD Horizon)                |
| CD45                | Brilliant Violet 510 anti-mouse CD45 (30-F 11)    | 103137 (BioLegend)                 |
| CD11b               | FITC rat anti-mouse CD11b (M1/70)                 | 555310 (BD Pharmingen)             |
| CD11c               | PE hamster anti-mouse CD11c (HL3)                 | 553802 (BD Pharmingen)             |
| CD163               | rabbit anti-mouse CD163 polyclonal IgG (M-96)     | sc33560 (Santa Cruz Biotechnology) |
| CD206               | APC anti-mouse CD206 (MMR) (C068C2)               | 141707 (BioLegend)                 |
| F4/80               | APC/Cy7 anti-mouse F4/80 (BM8)                    | 123117 (BioLegend)                 |
| <i>Secondary</i>    |                                                   |                                    |
|                     | goat anti-rabbit IgG, F(ab') <sub>2</sub> -PE-Cy7 | sc3845 (Santa Cruz Biotechnology)  |

**Supplementary Table 3.** Primary antibodies for immunohistochemical stain.

| <b>Protein Name</b> | <b>Antibodies</b>                                     | <b>Product Codes</b>  |
|---------------------|-------------------------------------------------------|-----------------------|
| OPN                 | anti-mouse OPN (O-17) rabbit polyclonal antibody      | 18621 (IBL Co., Ltd.) |
| CD44                | anti-mouse CD44 (IM7.8.1) rat monoclonal antibody     | 822201 (BioLegend)    |
| MCP-1               | anti-mouse MCP-1 (ab9669) rabbit polyclonal antibody  | ab9669 (Abcam)        |
| FN                  | anti-mouse FN (H-300) rabbit monoclonal antibody      | sc9068 (Santa Cruz)   |
| VCAM1               | anti-mouse VCAM1 (EPR5047) rabbit polyclonal antibody | ab134047 (Abcam)      |

**Supplementary Table 4.** TaqMan primer information which were used for Quantitative Reverse Transcription polymerase chain reaction.

| Probe  | Gene Name                                        | TaqMan Assay ID |
|--------|--------------------------------------------------|-----------------|
| Spp1   | secreted phosphoprotein 1                        | Mm00436767_m1   |
| Cd44   | cd44                                             | Mm01277163_m1   |
| Ccl2   | chemokine (CC motif) ligand 2                    | Mm00441242_m1   |
| C3     | complement component 3                           | Mm01232779_m1   |
| Fn1    | fibronectin 1                                    | Mm01256744_m1   |
| Vcam1  | vascular cell adhesion molecule 1                | Mm01320970_m1   |
| Il6    | interleukin 6                                    | Mm00446190_m1   |
| Nos2   | nitric oxide synthase 2                          | Mm00440502_m1   |
| Tnf    | tumor necrosis factor                            | Mm00443258_m1   |
| Arg1   | arginase                                         | Mm00475988_m1   |
| Chi3l3 | chitinase 3-like 3                               | Mm04213363_u1   |
| Il10   | interleukin 10                                   | Mm00439614_m1   |
| Pparg  | peroxisome proliferator activated receptor gamma | Mm00440940_m1   |
| Retnla | resistin like alpha                              | Mm00445109_m1   |

**Supplementary Figure 1.** The expression of each protein contained in each M $\phi$  culture medium. The expression of each protein that was secreted in the supernatant was determined by Enzyme-linked immunoSorbent Assay (ELISA). Data are presented as means  $\pm$  standard errors. N = 6 for each group. \* indicates significant differences among three different macrophages at  $p < 0.05$ ; # indicates significant differences in the mono-culture of each macrophage group at  $p < 0.05$ ; § indicates significant differences in the mono-culture of each macrophage group incubated with COM crystals at  $p < 0.05$ . OPN, osteopontin; MCP-1, monocyte chemoattractant protein-1; IL-6, interleukin-6; TNF $\alpha$ , tumor necrosis factor  $\alpha$ ; RTC, renal tubular cell.

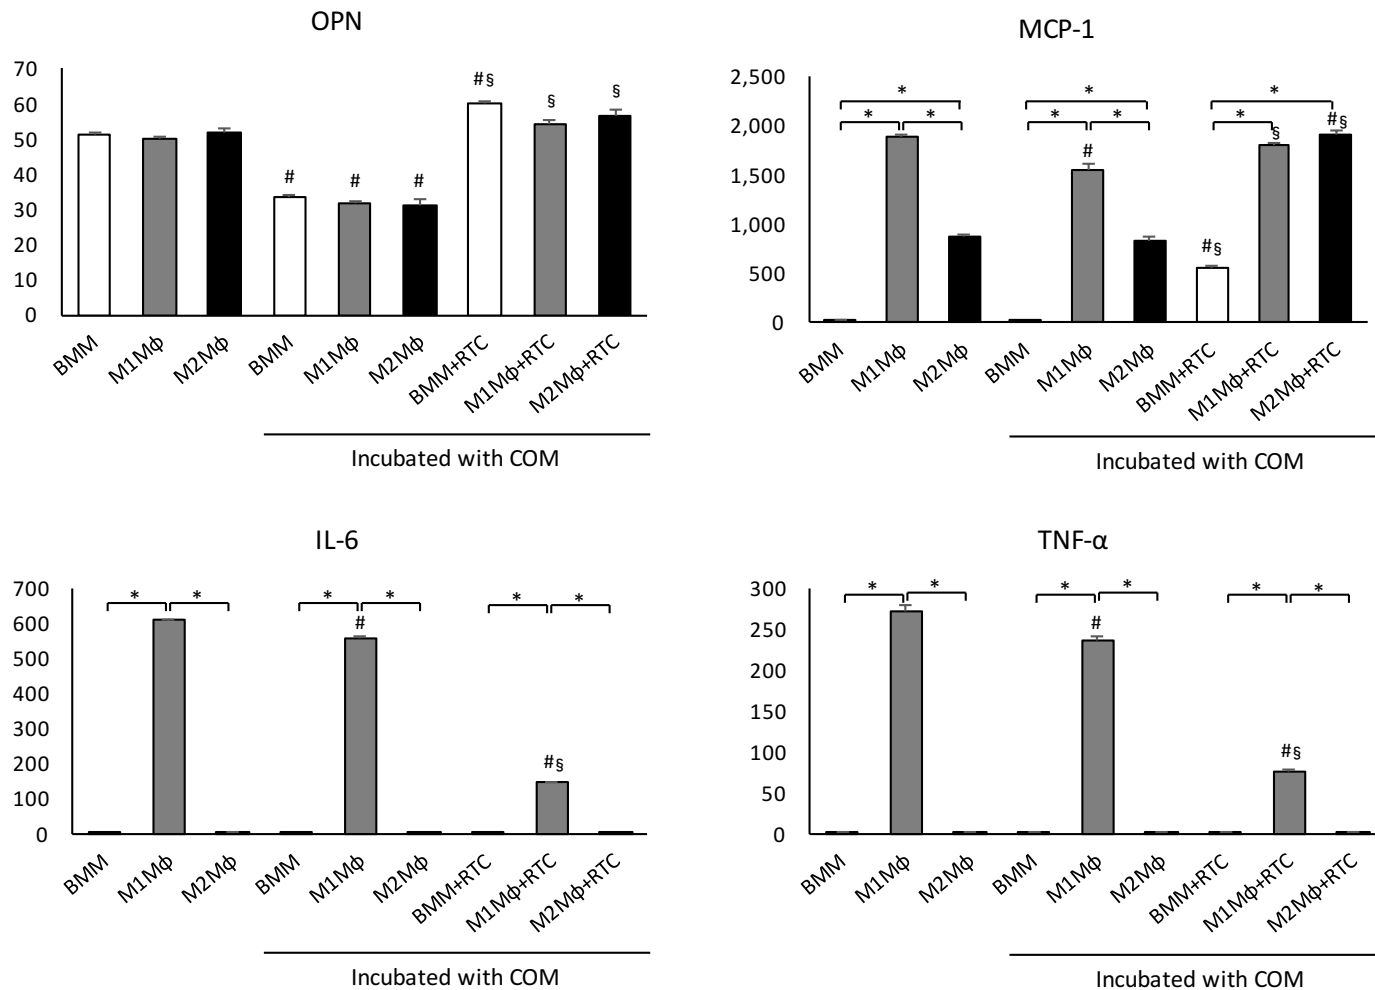

**Supplementary Figure 2.** The ratio of renal crystal deposits/ urinary crystal excretion. Either ratio of renal crystal deposits or urinary crystal excretion were calculated using the ratio of the GOX group as average, which were described in Figure 3B and 3C.

N = 6 for each group. Data are presented as means  $\pm$  standard errors. \* indicates significant differences compared with the glyoxylate (GOX)-treated group. M1 (T) and M2 (T) indicate transfusion, whereas M1 (I) and M2 (I) induction treatment of each macrophage.

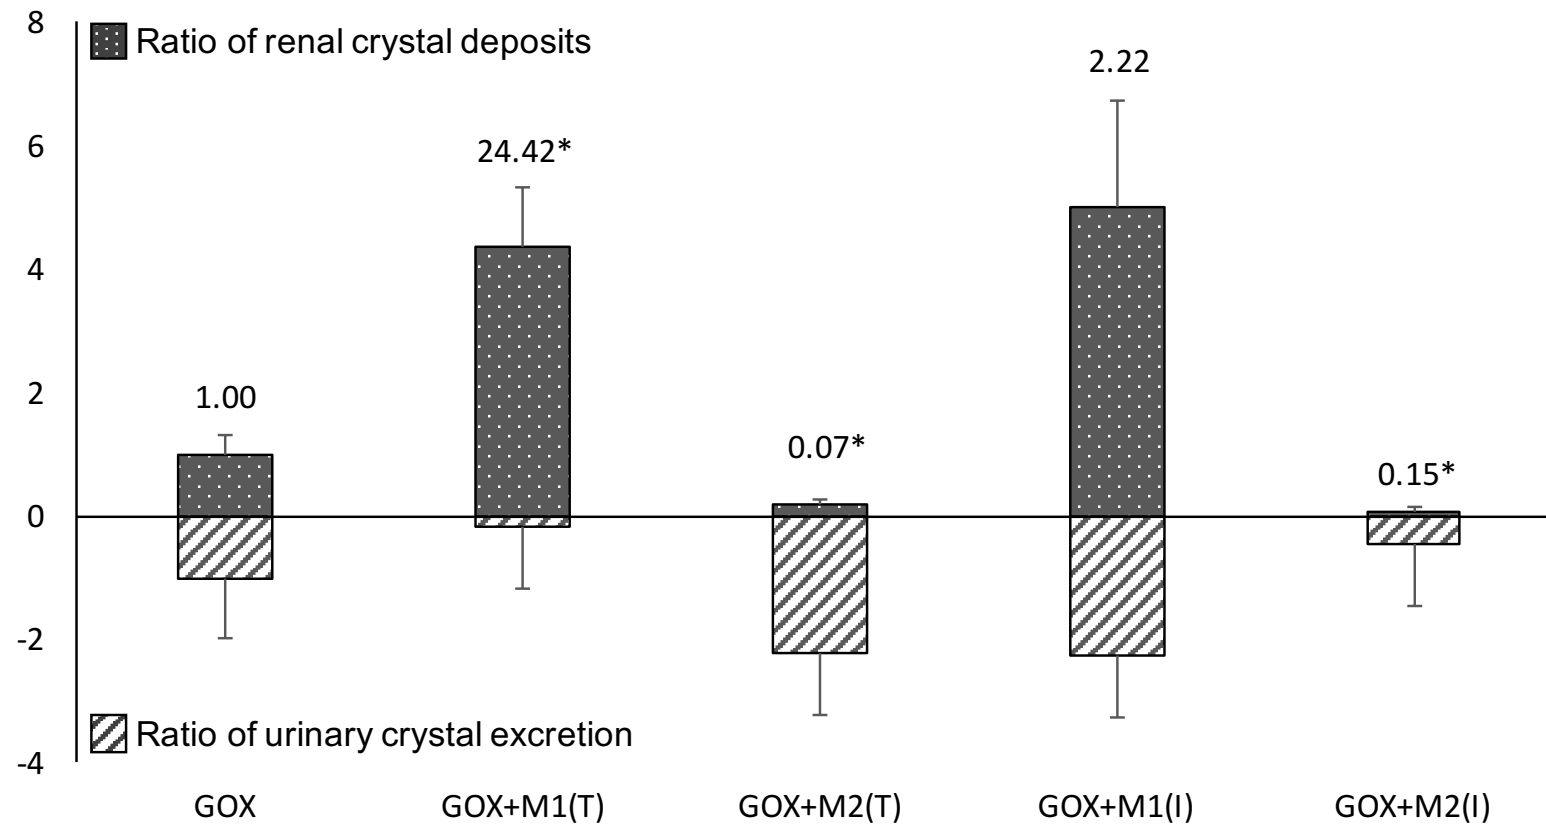

Supplement: srep35167-s1.pdf [file srep35167-s1.pdf]
